# Supplementary material for: Inhibition Mechanism of Components Isolated from Morus alba Branches on Diabetes and Diabetic Complications via Experimental and Molecular Docking Analyses
Source: MDPI journal article supplement (doi:10.3390/antiox11020383), 2022-02-14
Supplement: s1 [file s1]

# Supplementary Materials: Inhibition Mechanism of Components Isolated from *Morus alba* Branches on Diabetes and Diabetic Complications via Experimental and Molecular Docking Analyses

Ryeong-Ha Kwon <sup>1</sup>, Niha Thaku <sup>1</sup>, Binod Timalisina <sup>1</sup>, Se-Eun Park <sup>2,3</sup>, Jae-Sue Choi <sup>2,\*</sup> and Hyun-Ah Jung <sup>1,\*</sup>

<sup>1</sup> Department of Food Science and Human Nutrition, Jeonbuk National University, Jeonju 54896, Korea; haha8447@gmail.com (R.H.K.); neehathaku@gmail.com (N.T.); binodtimalisina19@gmail.com (B.T.)

<sup>2</sup> Department of Food Science and Nutrition, Pukyong National University, Busan 48513, Korea; gogo1685@naver.com

<sup>3</sup> Department of Biomedical Science, Asan Medical Institute of Convergence Science and Technology, Seoul 05505, Korea

\* Correspondence: choijs@pknu.ac.kr (J.S.C.); jungha@jbnu.ac.kr (H.A.J.); Tel.: +82-51-629-7547 (J.S.C.); +82-63-270-4882 (H.A.J.)

Table S1. <sup>1</sup>H and <sup>13</sup>C NMR chemical shifts of compounds **1**, **3**, **6**, and **8**

Table S2. <sup>1</sup>H and <sup>13</sup>C NMR chemical shifts of compounds **2**, **4**, **5**, and **7**

Scheme S1. The extraction and fractionation of the *Morus alba* branches

Scheme S2. The isolation of compounds from the EtOAc fraction of the *Morus alba* branches

Figure S1. Molecular docking analysis (2D diagram) for  $\alpha$ -glucosidase inhibition

Figure S2. Molecular docking analysis (2D diagram) for PTP1B inhibition

Table S1. <sup>1</sup>H and <sup>13</sup>C NMR chemical shifts of compounds **1**, **3**, **6**, and **8**

| No.  | Kuwanon C ( <b>1</b> ) <sup>1</sup>   |                | Dihydromorin ( <b>3</b> ) <sup>2</sup> |                | Norartocarpetin ( <b>6</b> ) <sup>2</sup> |                | Kaempferol 7- <i>O</i> -β-D-glucopyranoside ( <b>8</b> ) <sup>3</sup> |                |
|------|---------------------------------------|----------------|----------------------------------------|----------------|-------------------------------------------|----------------|-----------------------------------------------------------------------|----------------|
|      | δ <sub>H</sub> ( <i>J</i> in Hz)      | δ <sub>C</sub> | δ <sub>H</sub> ( <i>J</i> in Hz)       | δ <sub>C</sub> | δ <sub>H</sub> ( <i>J</i> in Hz)          | δ <sub>C</sub> | δ <sub>H</sub> ( <i>J</i> in Hz)                                      | δ <sub>C</sub> |
| 2    |                                       | 161.7          | 5.39 (1H, d, <i>J</i> = 12 Hz)         | 79.9           |                                           | 165.9          |                                                                       | 147.5          |
| 3    |                                       | 121.3          | 4.79 (1H, d, <i>J</i> = 12 Hz)         | 72.4           | 7.14 (1H, s)                              | 108.2          |                                                                       | 136.0          |
| 4    |                                       | 184.0          |                                        | 198.9          |                                           | 184.3          |                                                                       | 176.1          |
| 4a   |                                       | 105.3          |                                        | 101.8          |                                           | 105.1          |                                                                       | 104.7          |
| 5    |                                       | 157.0          |                                        | 168.5          |                                           | 163.0          | 12.4 (OH, s)                                                          | 160.3          |
| 6    | 6.24 (1H, s)                          | 98.9           | 5.88 (1H, d, <i>J</i> = 1.2 Hz)        | 96.2           | 6.19 (1H, d, <i>J</i> = 2.5 Hz)           | 99.8           | 6.41 (1H, d, <i>J</i> = 1.5 Hz)                                       | 98.8           |
| 7    |                                       | 163.6          |                                        | 164.9          |                                           | 164.1          |                                                                       | 162.7          |
| 8    |                                       | 107.5          | 5.92 (1H, d, <i>J</i> = 1.8 Hz)        | 97.1           | 6.42 (1H, d, <i>J</i> = 1.8 Hz)           | 94.8           | 6.79 (1H, d, <i>J</i> = 2.5 Hz)                                       | 94.4           |
| 8a   |                                       | 162.6          |                                        | 165.2          |                                           | 163.3          |                                                                       | 155.7          |
| 1'   |                                       | 113.5          |                                        | 115.5          |                                           | 110.7          |                                                                       | 121.5          |
| 2'   |                                       | 157.8          |                                        | 158.5          |                                           | 159.4          | 8.06 (1H, d, <i>J</i> = 8.5 Hz)                                       | 129.6          |
| 3'   | 6.44 (1H, d, <i>J</i> = 2.0 Hz)       | 103.7          | 6.37 (1H, d, <i>J</i> = 5.4 Hz)        | 103.6          | 6.42 (1H, d, <i>J</i> = 3.0 Hz)           | 104.1          | 6.93 (1H, d, <i>J</i> = 9.0 Hz)                                       | 115.5          |
| 4'   |                                       | 160.6          |                                        | 160.1          |                                           | 160.4          |                                                                       | 159.4          |
| 5'   | 6.41 (1H, dd, <i>J</i> = 2.4, 8.4 Hz) | 107.8          | 6.36 (1H, d, <i>J</i> = 1.2 Hz)        | 107.9          | 6.46 (1H, dd, <i>J</i> = 2.4, 8.5 Hz)     | 109.1          | 6.93 (1H, d, <i>J</i> = 9.0 Hz)                                       | 115.5          |
| 6'   | 7.08 (1H, d, <i>J</i> = 8.4 Hz)       | 132.0          | 7.22 (1H, d, <i>J</i> = 9.0 Hz)        | 130.9          | 7.77 (1H, d, <i>J</i> = 8.5 Hz)           | 131.0          | 8.06 (1H, d, <i>J</i> = 8.5 Hz)                                       | 129.6          |
| 1''  | 3.11 (2H, s)                          | 24.8           |                                        |                |                                           |                | 5.05 (1H, d, <i>J</i> = 7.0 Hz)                                       | 99.9           |
| 2''  | 5.10 (1H, t, <i>J</i> = 5.2 Hz)       | 122.9          |                                        |                |                                           |                |                                                                       | 73.1           |
| 3''  |                                       | 132.6          |                                        |                |                                           |                |                                                                       | 76.4           |
| 4''  | 1.40 (3H, s)                          | 17.6           |                                        |                |                                           |                |                                                                       | 69.6           |
| 5''  | 1.58 (3H, s)                          | 25.8           |                                        |                |                                           |                |                                                                       | 77.1           |
| 6''  |                                       |                |                                        |                |                                           |                |                                                                       | 60.6           |
| 1''' | 3.36 (2H, s)                          | 22.3           |                                        |                |                                           |                |                                                                       |                |
| 2''' | 5.17 (1H, t, <i>J</i> = 6.0 Hz)       | 123.4          |                                        |                |                                           |                |                                                                       |                |
| 3''' |                                       | 132.4          |                                        |                |                                           |                |                                                                       |                |
| 4''' | 1.56 (3H, s)                          | 17.7           |                                        |                |                                           |                |                                                                       |                |
| 5''' | 1.60 (3H, s)                          | 25.9           |                                        |                |                                           |                |                                                                       |                |

<sup>1</sup> CD<sub>3</sub>OD, <sup>1</sup>H (400 MHz), <sup>13</sup>C (100 MHz), <sup>2</sup> CD<sub>3</sub>OD, <sup>1</sup>H (500 MHz), <sup>13</sup>C (125 MHz), <sup>3</sup> (CD<sub>3</sub>)<sub>2</sub>SO, <sup>1</sup>H (500 MHz), <sup>13</sup>C (125 MHz)

Table S2. <sup>1</sup>H and <sup>13</sup>C NMR chemical shifts of compounds **2**, **4**, **5**, and **7**

| No. | Moracin M ( <b>2</b> ) <sup>1</sup> |                | β-Sitosterol glucoside ( <b>4</b> ) <sup>2</sup> |                | Oxyresveratrol ( <b>5</b> ) <sup>3</sup> |                | Kuwanon G ( <b>7</b> ) <sup>4</sup> |                |
|-----|-------------------------------------|----------------|--------------------------------------------------|----------------|------------------------------------------|----------------|-------------------------------------|----------------|
|     | δ <sub>H</sub> ( <i>J</i> in Hz)    | δ <sub>C</sub> | δ <sub>H</sub> ( <i>J</i> in Hz)                 | δ <sub>C</sub> | δ <sub>H</sub> ( <i>J</i> in Hz)         | δ <sub>C</sub> | δ <sub>H</sub> ( <i>J</i> in Hz)    | δ <sub>C</sub> |
| 1   |                                     |                |                                                  | 37.5           | CD <sub>3</sub> OD, 400 MHz              | 117.8          |                                     |                |
| 2   |                                     | 156.1          |                                                  | 30.3           |                                          | 157.3          |                                     | 162.5          |
| 3   | 6.92 (1H, s)                        | 102.2          |                                                  | 78.6           | 6.30 (1H, m)                             | 108.3          |                                     | 121.7          |
| 3a  |                                     | 123.0          |                                                  |                |                                          |                |                                     |                |

|    |                                  |       |                            |       |                            |       |                                                 |       |
|----|----------------------------------|-------|----------------------------|-------|----------------------------|-------|-------------------------------------------------|-------|
| 4  | 7.35 (1H, d, $J = 8.0$ Hz)       | 122.0 |                            | 40.0  |                            | 159.2 |                                                 | 183.9 |
| 4a |                                  |       |                            |       |                            |       |                                                 | 105.7 |
| 5  | 6.75 (1H, dd, $J = 2.0, 8.0$ Hz) | 113.3 |                            | 140.9 | 6.30 (1H, m)               | 103.5 |                                                 | 157.8 |
| 6  |                                  | 156.8 | 5.34 (1H, d, $J = 4.8$ Hz) | 121.9 | 7.32 (1H, d, $J = 6.0$ Hz) | 128.4 | 5.94 (1H, s)                                    | 98.5  |
| 7  | 6.92 (1H, d, $J = 1.5$ Hz)       | 98.4  |                            | 32.2  |                            |       |                                                 | 165.7 |
| 7a |                                  | 157.2 |                            |       |                            |       |                                                 |       |
| 8  |                                  |       |                            | 32.1  |                            |       |                                                 | 108.6 |
| 8a |                                  |       |                            |       |                            |       |                                                 | 162.5 |
| 9  |                                  |       |                            | 50.3  |                            |       | 3.19 (2H, br)                                   | 24.7  |
| 10 |                                  |       |                            | 36.9  |                            |       | 5.17 (1H, t, $J = 7.2$ Hz)                      | 123.0 |
| 11 |                                  |       |                            | 21.3  |                            |       |                                                 | 132.7 |
| 12 |                                  |       |                            | 39.3  |                            |       | 1.64 (3H, s)                                    | 25.9  |
| 13 |                                  |       |                            | 42.5  |                            |       | 1.46 (3H, s)                                    | 17.7  |
| 14 |                                  |       |                            | 56.8  |                            |       | 4.34 (1H, d, $J = 8.4$ Hz)                      | 23.1  |
| 15 |                                  |       |                            | 24.5  |                            |       | 5.19 (1H, brs)                                  | 124.6 |
| 16 |                                  |       |                            | 28.6  |                            |       |                                                 | 134.4 |
| 17 |                                  |       |                            | 56.2  |                            |       | 1.49 (3H, brs)                                  | 25.9  |
| 18 |                                  |       | 0.65 (3H, s)               | 12.0  |                            |       | 1.95 (2H, br)                                   | 39.1  |
| 19 |                                  |       | 0.98 (3H, d, $J = 6.6$ Hz) | 19.4  |                            |       | 3.35 (1H, s)                                    | 23.1  |
| 20 |                                  |       |                            | 36.4  |                            |       | 4.58 (1H, brd, $J = 33$ Hz)                     | 49.9  |
| 21 |                                  |       | 1.06 (3H, m)               | 19.0  |                            |       |                                                 | 210.2 |
| 22 |                                  |       |                            | 34.2  |                            |       |                                                 | 115.9 |
| 23 |                                  |       |                            | 26.4  |                            |       |                                                 | 165.9 |
| 24 |                                  |       |                            | 46.0  |                            |       | 5.94 (1H, s)                                    | 103.7 |
| 25 |                                  |       |                            | 29.5  |                            |       |                                                 | 165.7 |
| 26 |                                  |       | 0.92 (3H, s)               | 19.2  |                            |       | 5.90 (1H, d, $J = 8.4$ Hz)                      | 108.6 |
| 27 |                                  |       | 0.86 (3H, t, $J = 6.0$ Hz) | 20.0  |                            |       | 7.34 (1H, brs) or<br>7.15 (1H, d, $J = 8.4$ Hz) | 132.7 |
| 28 |                                  |       |                            | 23.4  |                            |       |                                                 | 123.0 |
| 29 |                                  |       | 0.88 (3H, t, $J = 6.0$ Hz) | 12.2  |                            |       |                                                 | 161.8 |
| 30 |                                  |       |                            |       |                            |       | 6.14 (1H, brs)                                  | 102.9 |
| 31 |                                  |       |                            |       |                            |       |                                                 | 161.1 |
| 32 |                                  |       |                            |       |                            |       | 6.08 (1H, dd, $J = 2.4, 8.4$ Hz)                | 108.2 |
| 33 |                                  |       |                            |       |                            |       | 6.75 (1H, d, $J = 7.2$ Hz)                      | 134.4 |
| 1' |                                  | 133.8 | 5.04 (1H, d, $J = 7.2$ Hz) | 102.6 |                            | 142.2 |                                                 | 113.8 |
| 2' | 6.78 (1H, d, $J = 2.0$ Hz)       | 103.9 |                            | 75.3  | 6.43 (1H, d, $J = 2.4$ Hz) | 105.6 |                                                 | 161.8 |
| 3' |                                  | 159.9 |                            | 78.5  |                            | 159.6 | 6.47 (1H, brs)                                  | 103.6 |
| 4' | 6.27 (1H, t, $J = 2.5$ Hz)       | 103.5 |                            | 71.7  | 6.12 (1H, t, $J = 2.4$ Hz) | 101.2 |                                                 | 162.5 |
| 5' |                                  | 159.9 |                            | 78.1  |                            | 159.6 | 6.50 (1H, s)                                    | 108.0 |

|          |                            |       |      |                             |       |                                              |       |
|----------|----------------------------|-------|------|-----------------------------|-------|----------------------------------------------|-------|
| 6'       | 6.78 (1H, d, $J$ = 2.0 Hz) | 103.9 | 62.8 | 6.43 (1H, d, $J$ = 2.4 Hz)  | 105.6 | 7.34 (1H, brs) or 7.15 (1H, d, $J$ = 8.4 Hz) | 132.7 |
| 2"       |                            |       |      |                             |       |                                              |       |
| 3"       |                            |       |      |                             |       |                                              |       |
| 4"       |                            |       |      |                             |       |                                              |       |
| 5"       |                            |       |      |                             |       |                                              |       |
| 6"       |                            |       |      |                             |       |                                              |       |
| $\alpha$ |                            |       |      | 6.80 (1H, d, $J$ = 16.4 Hz) | 124.8 |                                              |       |
| $\beta$  |                            |       |      | 7.26 (1H, d, $J$ = 16 Hz)   | 126.5 |                                              |       |

<sup>1</sup> CD<sub>3</sub>OD, <sup>1</sup>H (500 MHz), <sup>13</sup>C (125 MHz), <sup>2</sup> C<sub>5</sub>D<sub>5</sub>N, <sup>1</sup>H (600 MHz), <sup>13</sup>C (150 MHz), <sup>3</sup> CD<sub>3</sub>OD, <sup>1</sup>H (400 MHz), <sup>13</sup>C (100 MHz), <sup>4</sup> CD<sub>3</sub>OD, <sup>1</sup>H (600 MHz), <sup>13</sup>C (150 MHz)

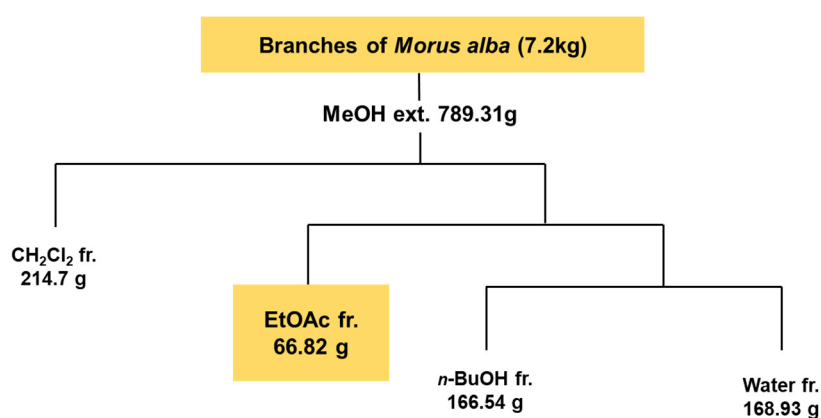

Scheme S1. The extraction and fractionation of the *Morus alba* branches

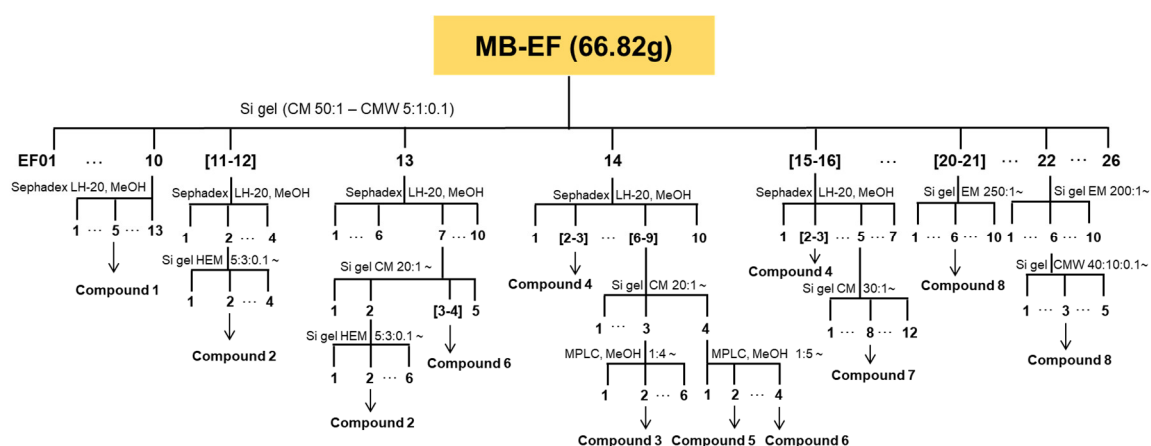

Scheme S2. The isolation of compounds from the EtOAc fraction of the *Morus alba* branches

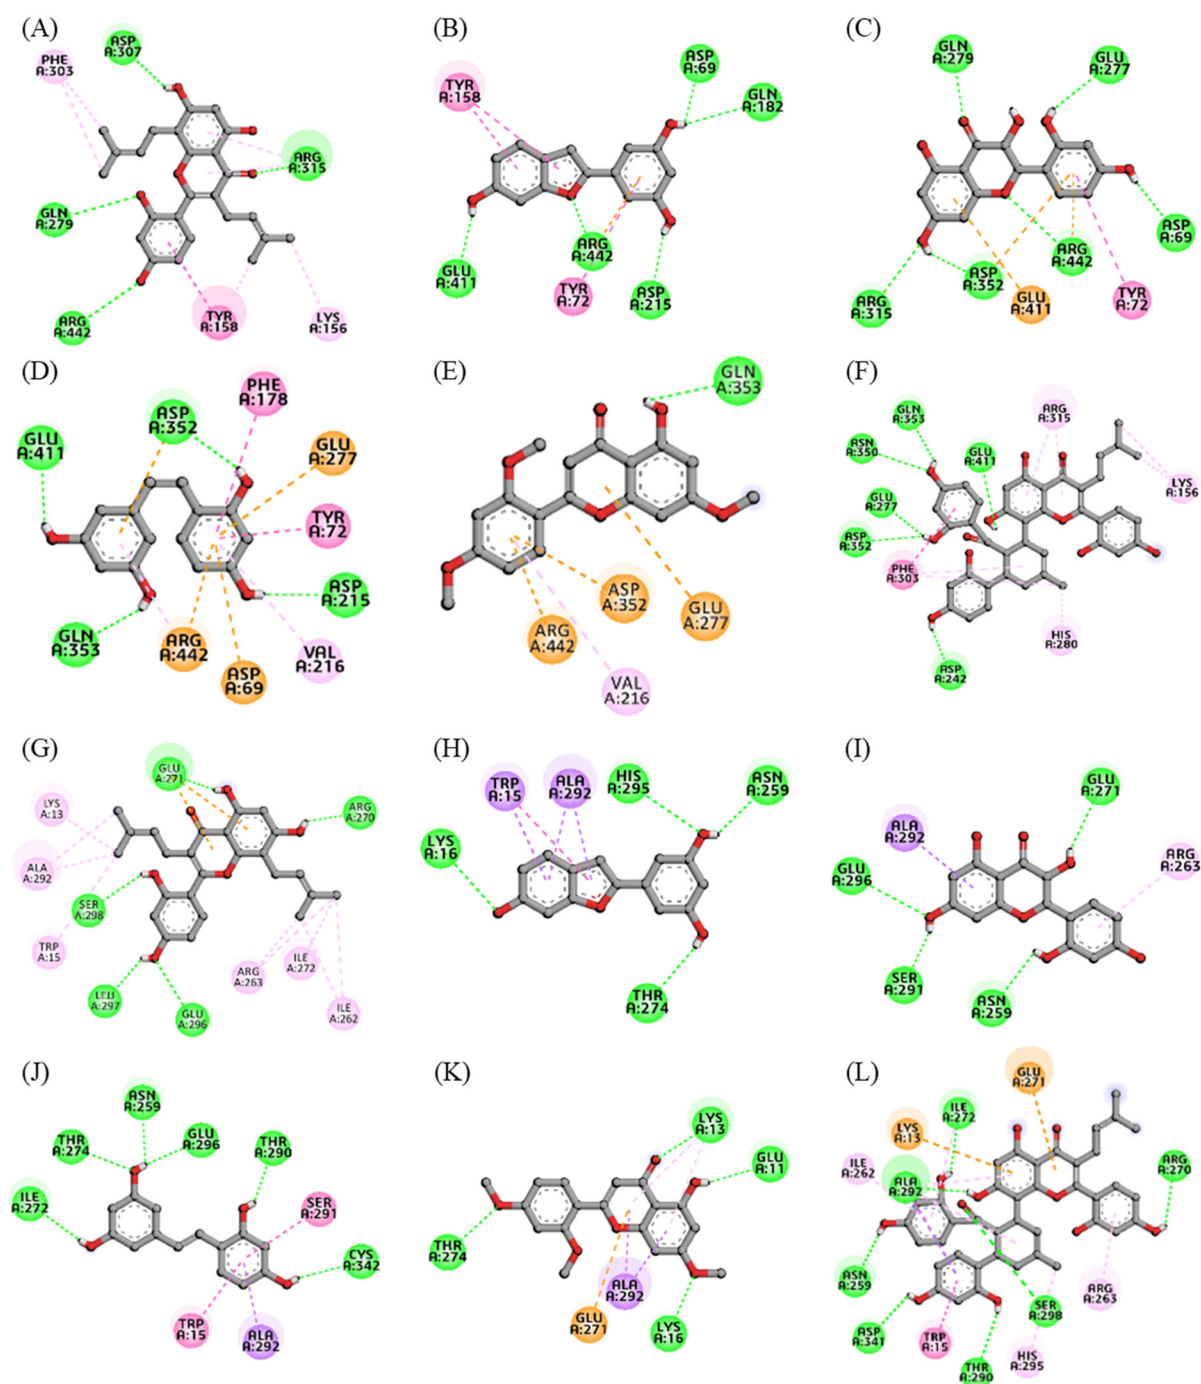

Figure S1. 2D-binding diagram of  $\alpha$ -glucosidase inhibition at catalytic (A-F) and allosteric sites (G-L) by compounds **1–3** and **5–7**, respectively: A and G for kuwanon C (**1**); B and H for moracin M (**2**); C and I for dihydromorin (**3**); D and J for oxyresveratrol (**5**); E and K for norartocarpetin (**6**); F and L for kuwanon G (**7**)

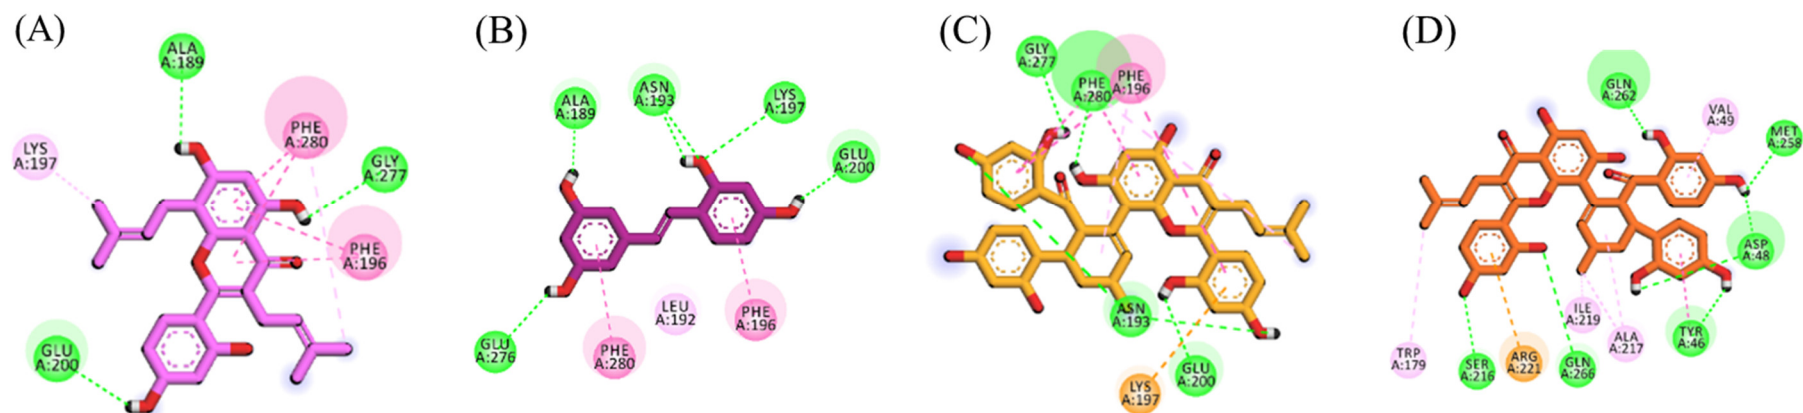

Figure S2. 2D-binding diagram of PTP1B inhibition at catalytic (D) and allosteric sites (A-C) by kuwanon C (**1**) (A), oxyresveratrol (**5**) (B), and kuwanon G (**7**) (C and D).
